# Supplementary material for: Roles of Physicochemical and Structural Properties of RNA-Binding Proteins in Predicting the Activities of Trans-Acting Splicing Factors with Machine Learning
Source: MDPI journal article supplement (doi:10.3390/ijms23084426), 2022-04-17
Supplement: s1 [file s1]

# **Roles of Physicochemical and Structural Properties of RNA Binding Proteins in Predicting the Activities of Trans-Acting Splicing Factors with Machine Learning**

*Lin Zhu<sup>1</sup> and Wenjin Li<sup>1,\*</sup>*

<sup>1</sup> *Institute for Advanced Study, Shenzhen University, Shenzhen 518060, China*

## ***\*Correspondence:***

*Wenjin Li, Room 720, Institute for Advanced Study, Shenzhen University, Shenzhen 518060, China;*

*E-mail: liwenjin@szu.edu.cn; Tel: +86-0755-26942336*

## **Supplementary materials**

Table S1: The performance of 647 features with the number of component ranging from 1 to 10.

Table S2: mRMR features list.

Table S3: The Spearman's correlation coefficient of the mRMR features list.

Table S4: Forward feature list.

Table S5: Spearman's correlation coefficient of the forward features list.

Table S6: Performance of Wang's features with the number of components ranging from 1 to 10.

Table S7: Original dataset consists of 85 splicing factors.

Table S8: Conversion of 85 experimentally tested splicing factors into a 700-dimensional feature matrix by feature encoding.

Table S9: Construction of a 647-dimensional feature matrix from the 700-dimension feature matrix by removing the features that are almost 0 in all samples.

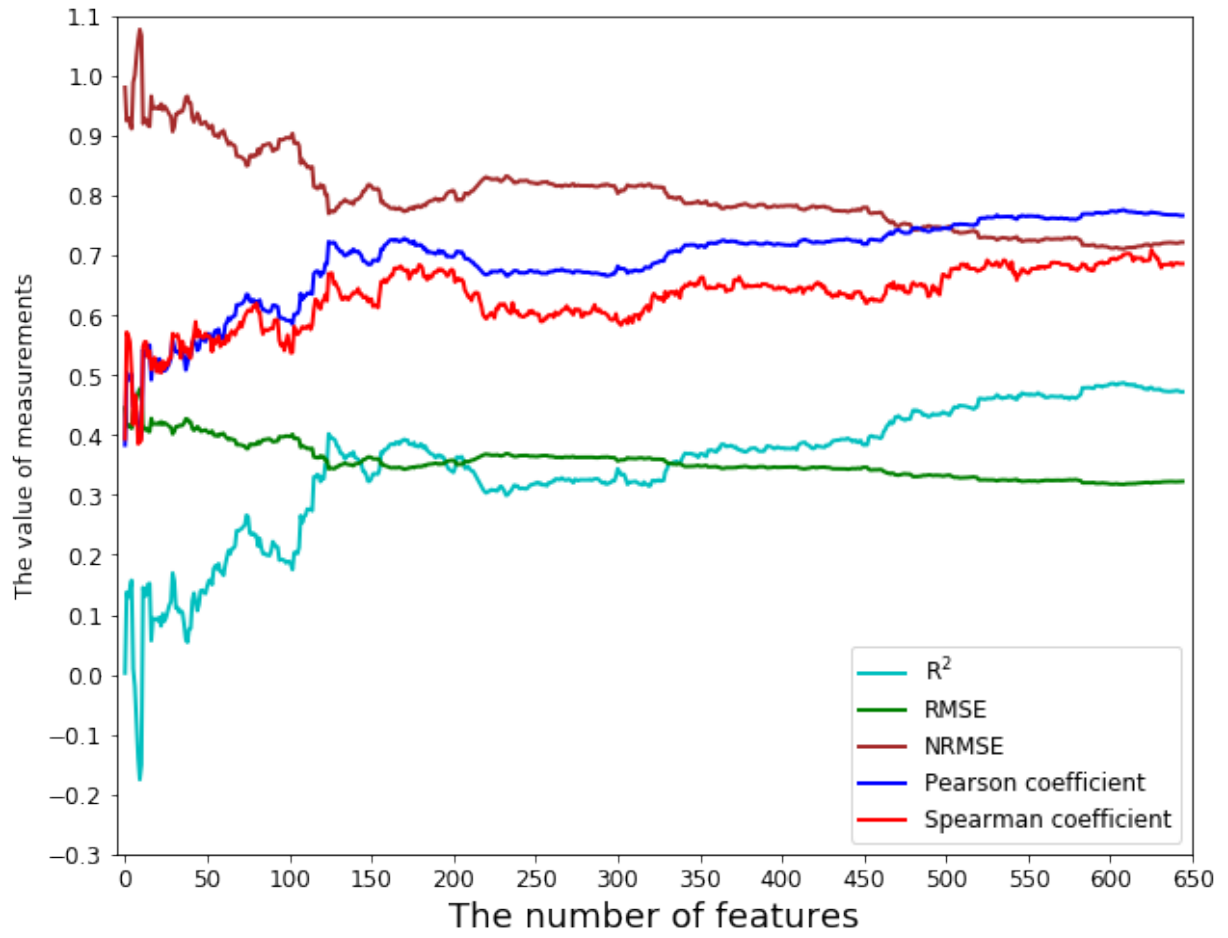

Figure S1: Curves of five metrics produced by the mRMR features. Three metrics  $R^2$ , Pearson's coefficient and Spearman's coefficient show a similar uptrend, and  $RMSE$  and  $NRMSE$  display a similar downtrend.

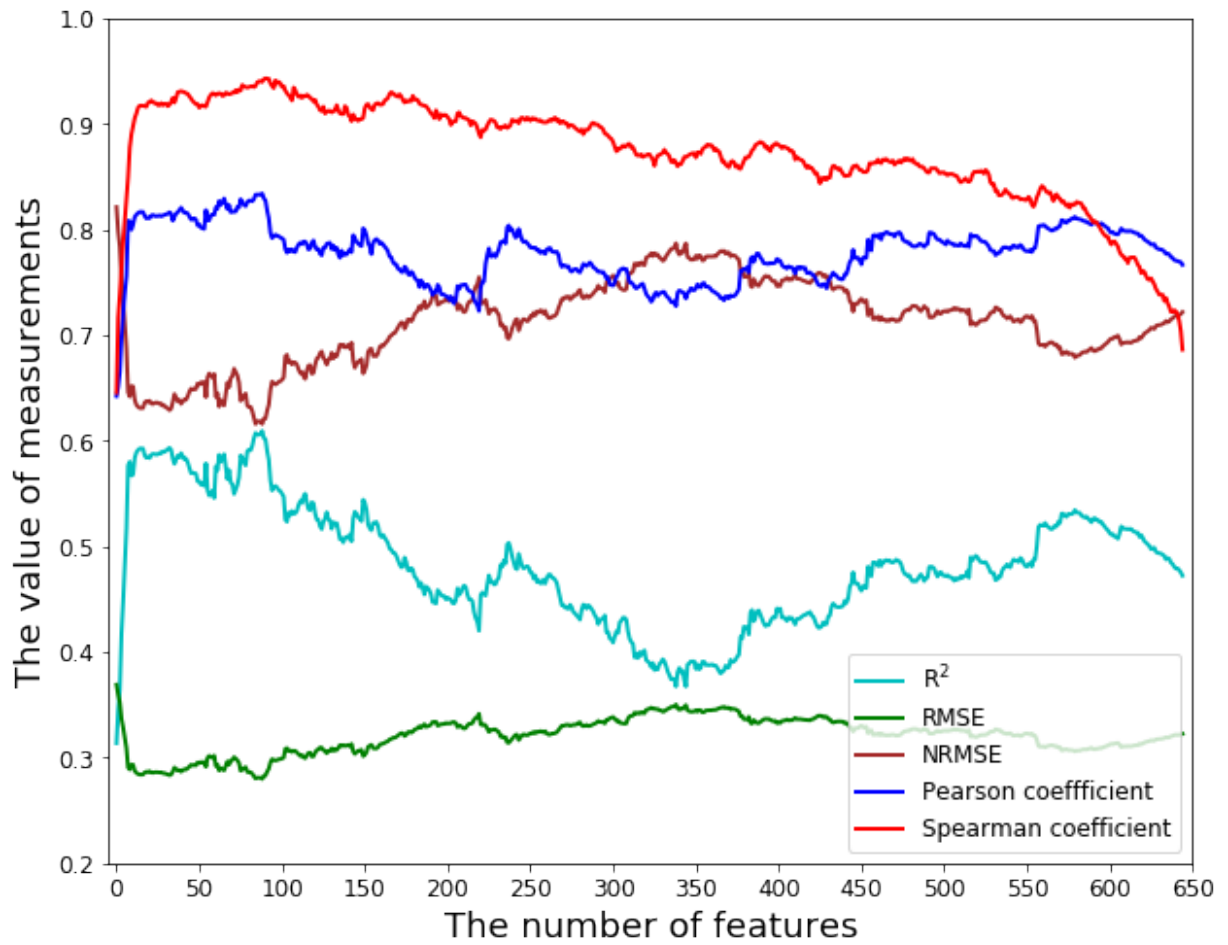

Figure S2: Curves of five metrics produced by using the forward feature searching strategy. Three metrics  $R^2$ , Pearson's coefficient and Spearman's coefficient show a similar trend, and  $RMSE$  and  $NRMSE$  display a similar trend.

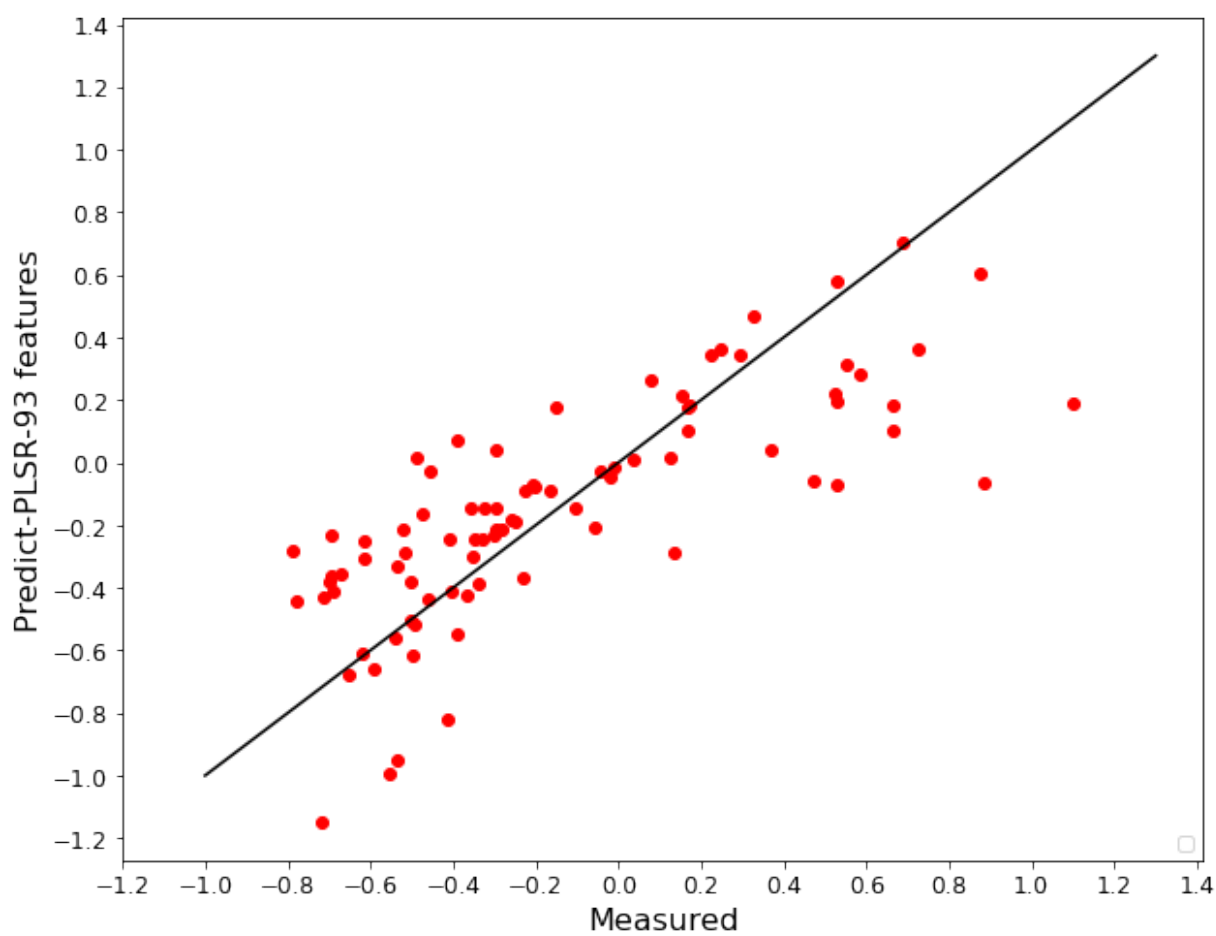

Figure S3: Fitting graph produced by 93 features, showing the best feature subset (93 features) with good performance.

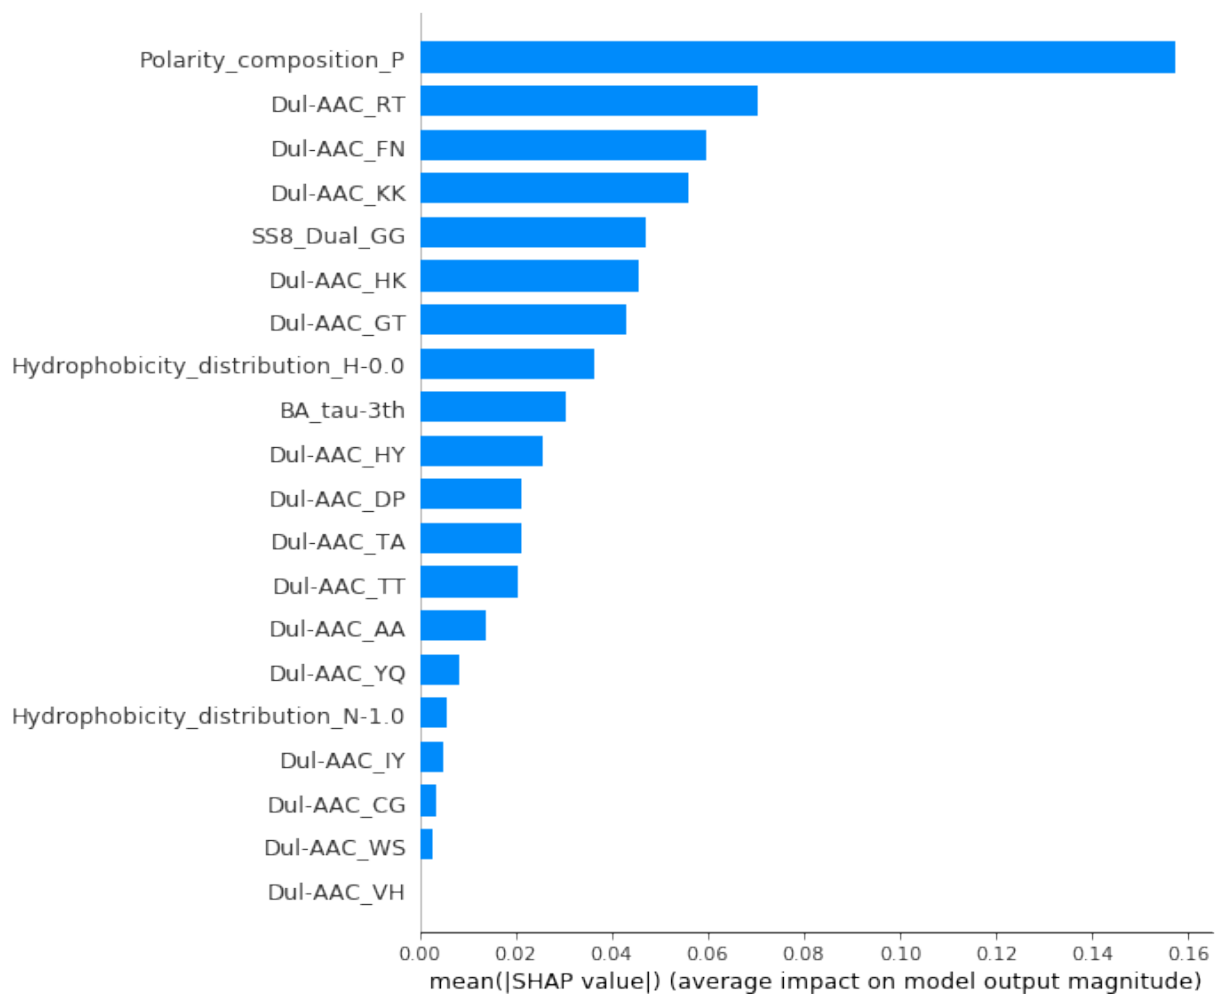

Figure S4: SHAP plot based on 5-fold cross-validation. We calculated the shap\_values for every model and its corresponding 17 validation RBPs, merged 5 shap\_values into one explainer, and visualized this explainer using SHAP bar plot.

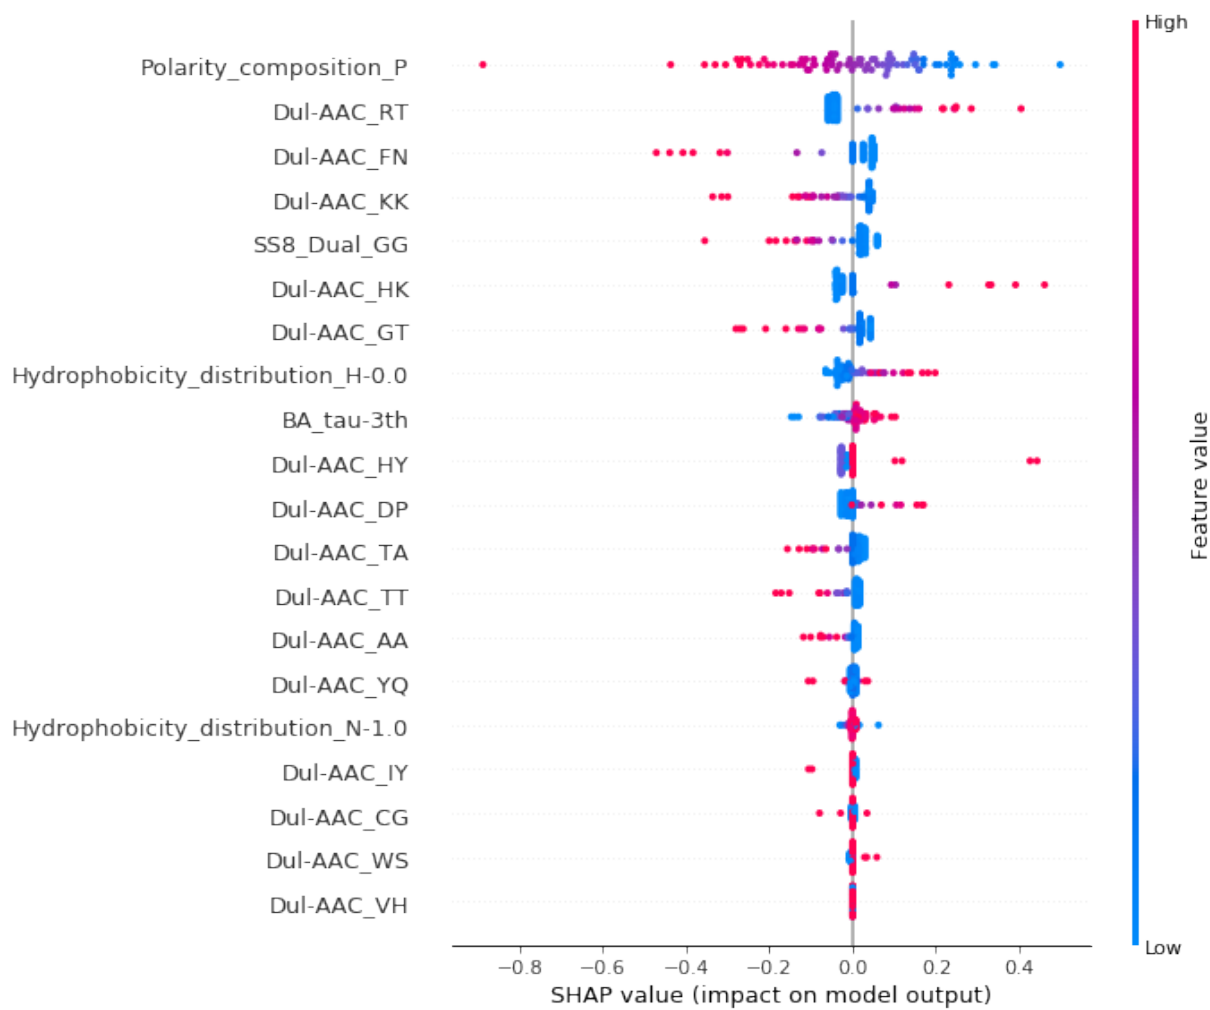

Figure S5: SHAP plot based on 5-fold cross-validation. We calculated the shap-values for every model and its corresponding 17 validation RBPs, merged 5 shap-values into one explainer, and visualized this explainer using SHAP beeswarm plot
